# Supplementary material for: Black TiO2-Based Dual Photoanodes Boost the Efficiency of Quantum Dot-Sensitized Solar Cells to 11.7%
Source: MDPI journal article supplement (doi:10.3390/nano12234294), 2022-12-02
Supplement: s1 [file s1]

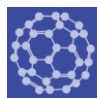

## Supplementary Materials

# Black TiO<sub>2</sub>-Based Dual Photoanodes Boost the Efficiency of Quantum Dot-Sensitized Solar Cells to 11.7%

Danwen Yao <sup>1,†</sup>, Zhenyu Hu <sup>2,†</sup>, Ruifeng Zheng <sup>2</sup>, Jialun Li <sup>2</sup>, Liying Wang <sup>2</sup>, Xijia Yang <sup>2</sup>, Wei Lü <sup>2,\*</sup>  
and Huailiang Xu <sup>1,3,\*</sup>

<sup>1</sup> State Key Laboratory of Integrated Optoelectronics, College of Electronic Science and Engineering, Jilin University, Changchun 130012, China

<sup>2</sup> State Key Laboratory of Advanced Structural Materials, Ministry of Education, Changchun University of Technology, Changchun 130012, China

<sup>3</sup> State Key Laboratory of Precision Spectroscopy and Chongqing Institute, East China Normal University, Shanghai 200062, China

\* Correspondence: lvwei@ccut.edu.cn (W.L.); huailiang@jlu.edu.cn (H.X.).

† These authors contribute equally to this work.

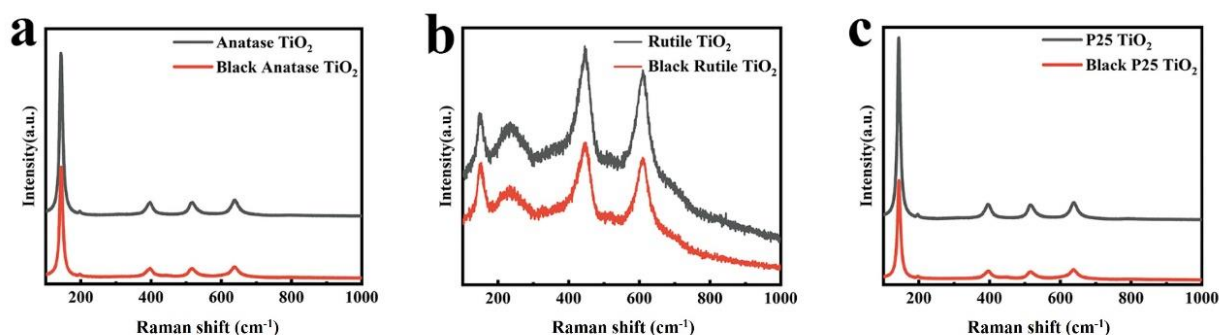

**Figure S1.** (a) Raman spectra of anatase TiO<sub>2</sub> and black anatase TiO<sub>2</sub>. (b) Raman spectra of rutile TiO<sub>2</sub> and black rutile TiO<sub>2</sub>. (c) Raman spectra of P25 TiO<sub>2</sub> and black P25 TiO<sub>2</sub>.

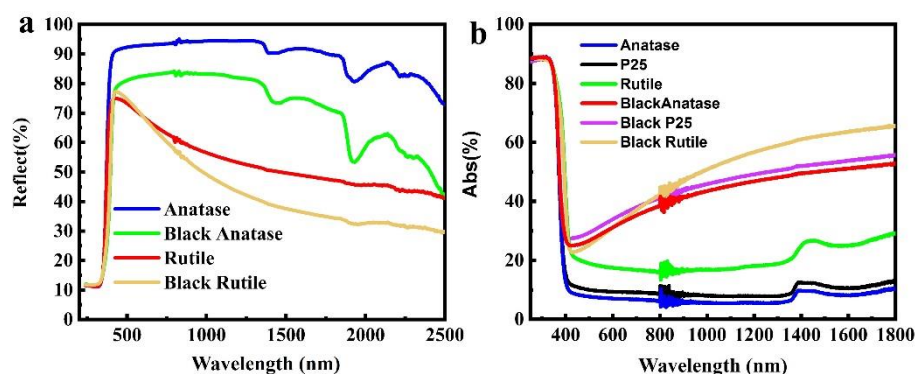

**Figure S2.** (a) Diffuse reflectance spectra of anatase, rutile, P25, black anatase, black rutile, black P25 nanoparticles. (b) Diffuse absorbance spectra of anatase, rutile, P25, black anatase, black rutile, black P25 nanoparticles.

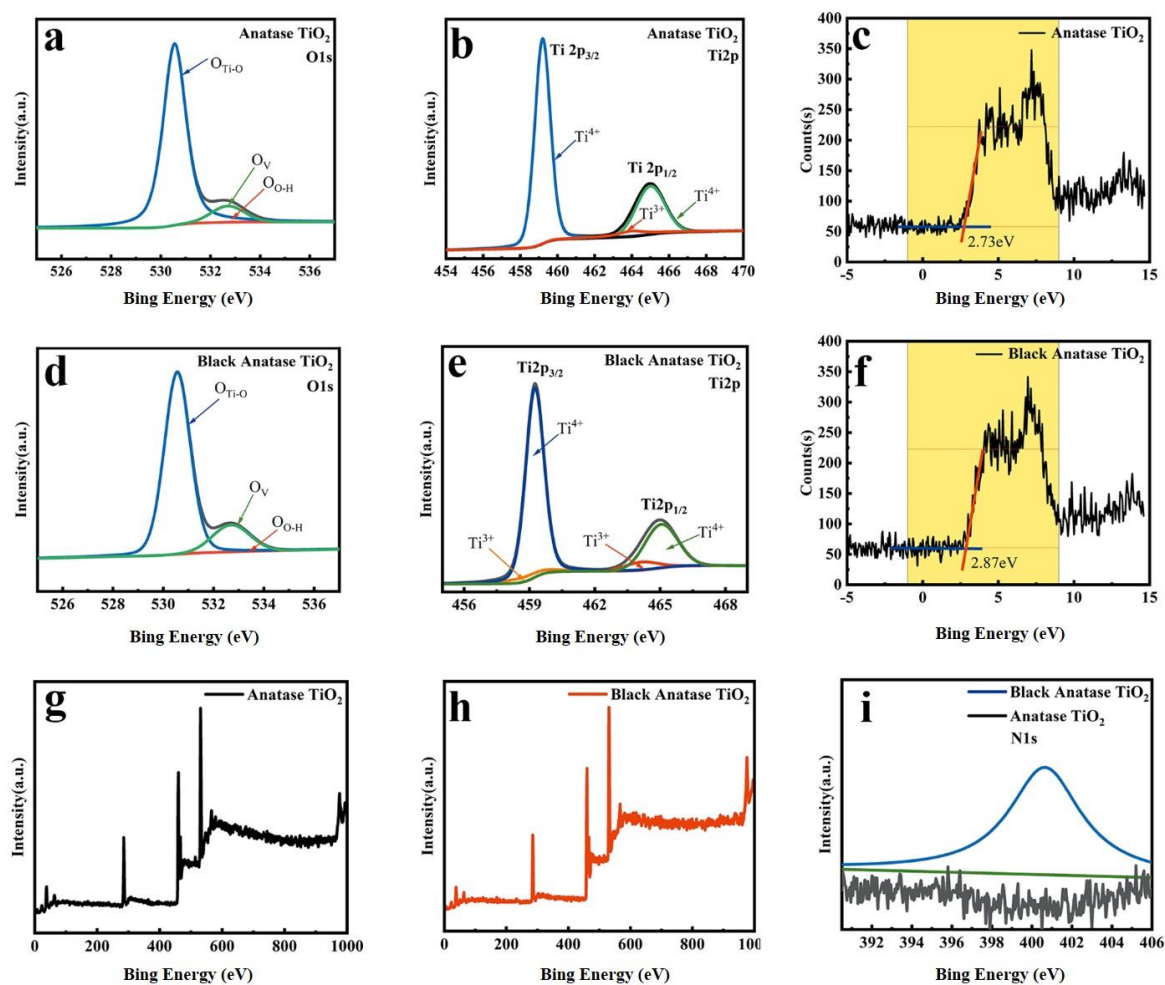

**Figure S3.** (a) O1s XPS spectrum of anatase TiO<sub>2</sub>. (b) Ti2p XPS spectrum of anatase TiO<sub>2</sub>. (c) UPS spectrum of anatase TiO<sub>2</sub>. (d) O1s XPS spectrum of black anatase TiO<sub>2</sub>. (e) Ti2p XPS spectrum of black anatase TiO<sub>2</sub>. (f) UPS spectrum of black anatase TiO<sub>2</sub>. (g) XPS survey of anatase TiO<sub>2</sub>. (h) XPS survey of black anatase TiO<sub>2</sub>. (i) N1s XPS spectra of anatase TiO<sub>2</sub> and black anatase TiO<sub>2</sub>. The green line is the baseline of the curve.

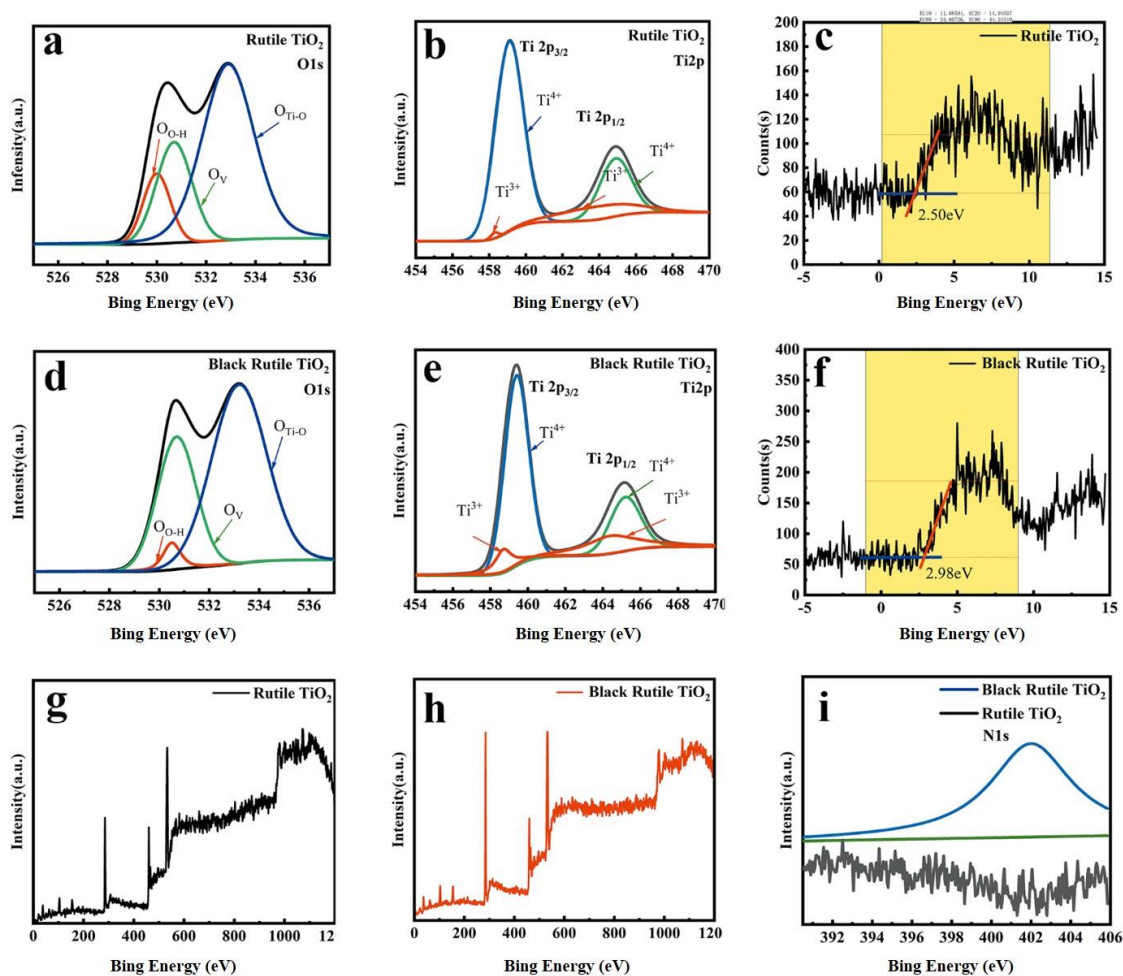

**Figure S4.** (a) O1s XPS spectrum of rutile TiO<sub>2</sub>. (b) Ti2p XPS spectrum of rutile TiO<sub>2</sub>. (c) UPS spectrum of rutile TiO<sub>2</sub>. (d) O1s XPS spectrum of black rutile TiO<sub>2</sub>. (e) Ti2p XPS spectrum of black rutile TiO<sub>2</sub>. (f) UPS spectrum of black rutile TiO<sub>2</sub>. (g) XPS survey of rutile TiO<sub>2</sub>. (h) XPS survey of black rutile TiO<sub>2</sub>. (i) N1s XPS spectrum of rutile TiO<sub>2</sub> and black rutile TiO<sub>2</sub>. The green line is the baseline of the curve.

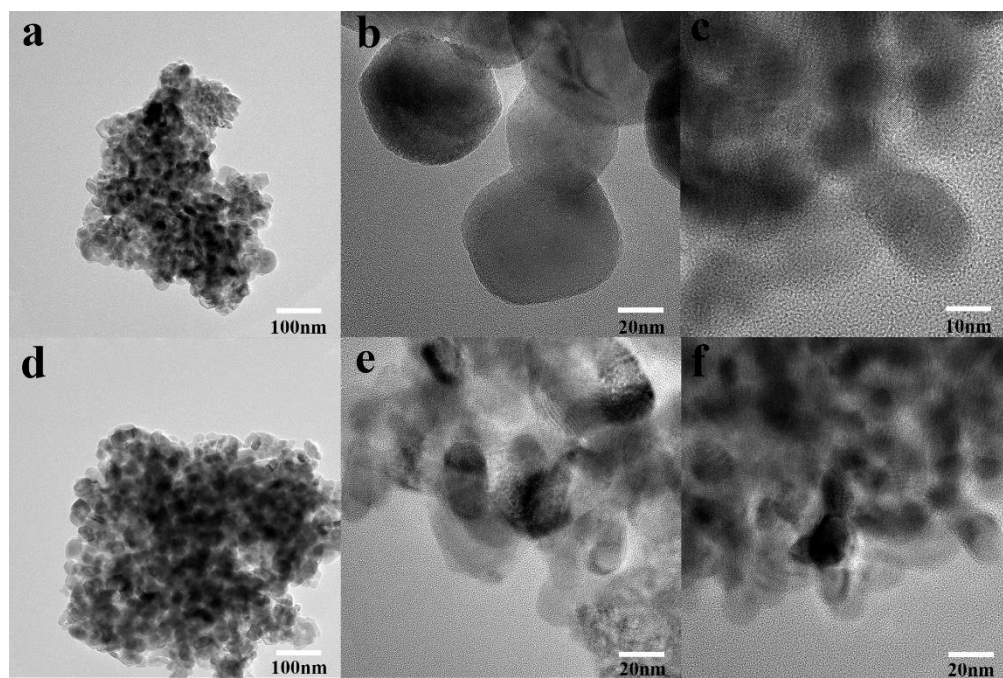

Figure S5. TEM and HRTEM images of anatase TiO<sub>2</sub> with different magnifications (a-f).

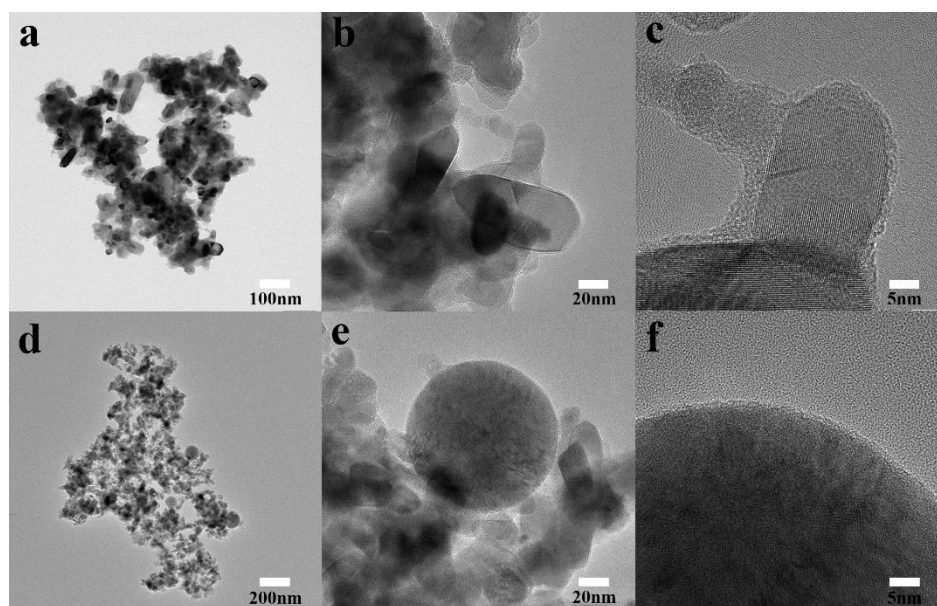

Figure S6. TEM and HRTEM images of black anatase TiO<sub>2</sub> with different magnifications (a-f).



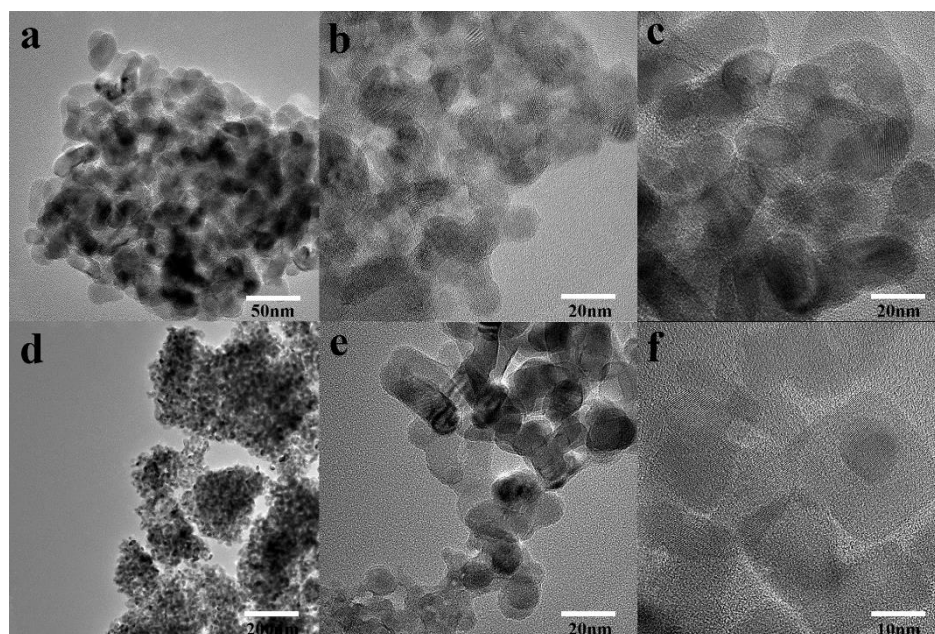

**Figure S7.** TEM and HRTEM images of rutile  $\text{TiO}_2$  with different magnifications (a–f).

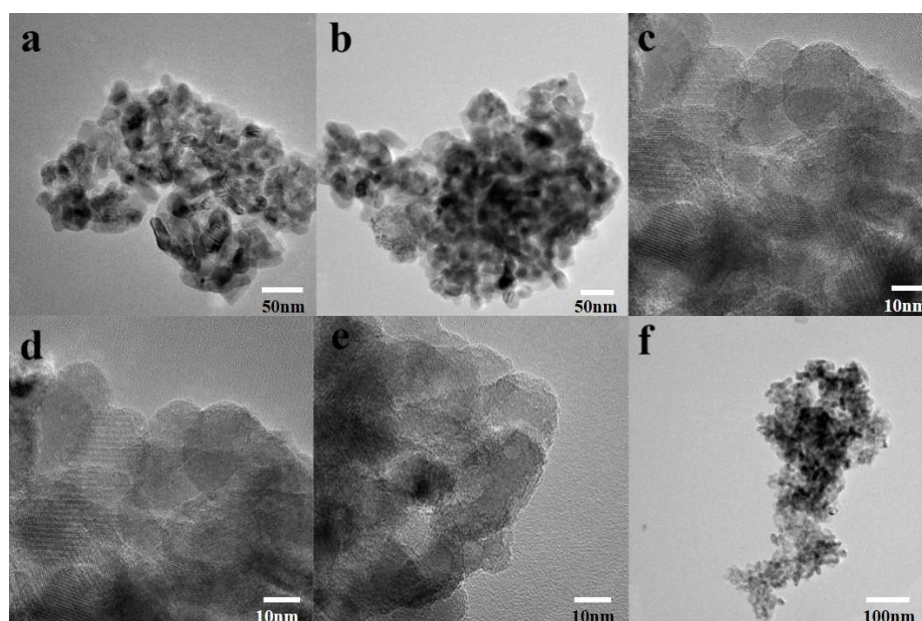

**Figure S8.** TEM and HRTEM images of black rutile  $\text{TiO}_2$  with different magnifications (a–f).

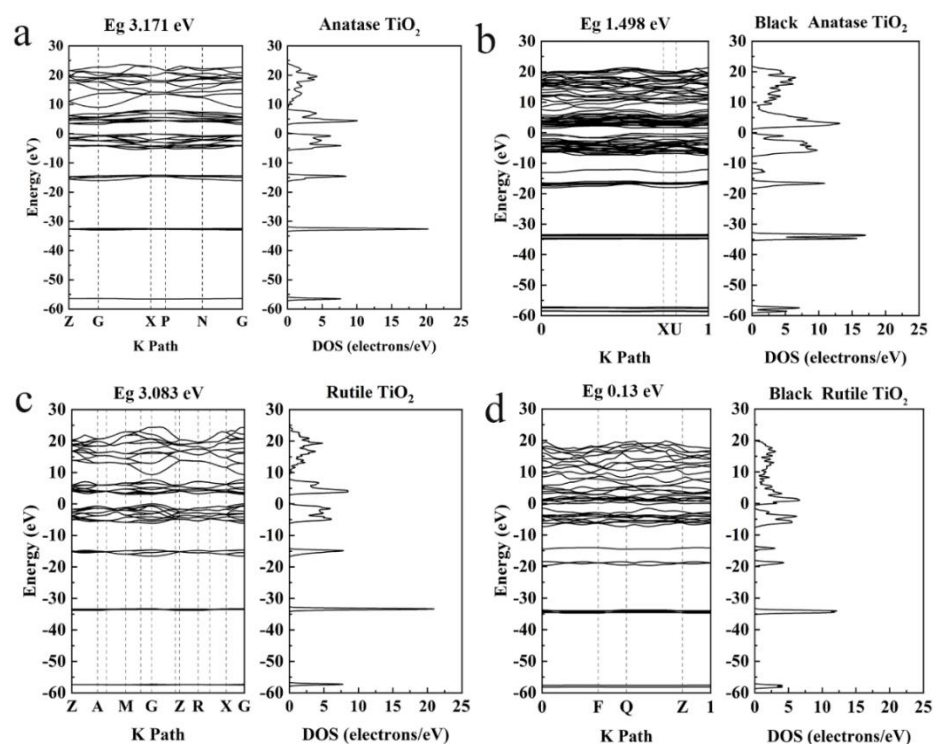

**Figure S9.** Energy band diagram and density of states spectrum obtained by first-principles calculations for (a) anatase  $\text{TiO}_2$ , (b) black anatase  $\text{TiO}_2$ , (c) rutile  $\text{TiO}_2$ , and (d) black rutile  $\text{TiO}_2$ .

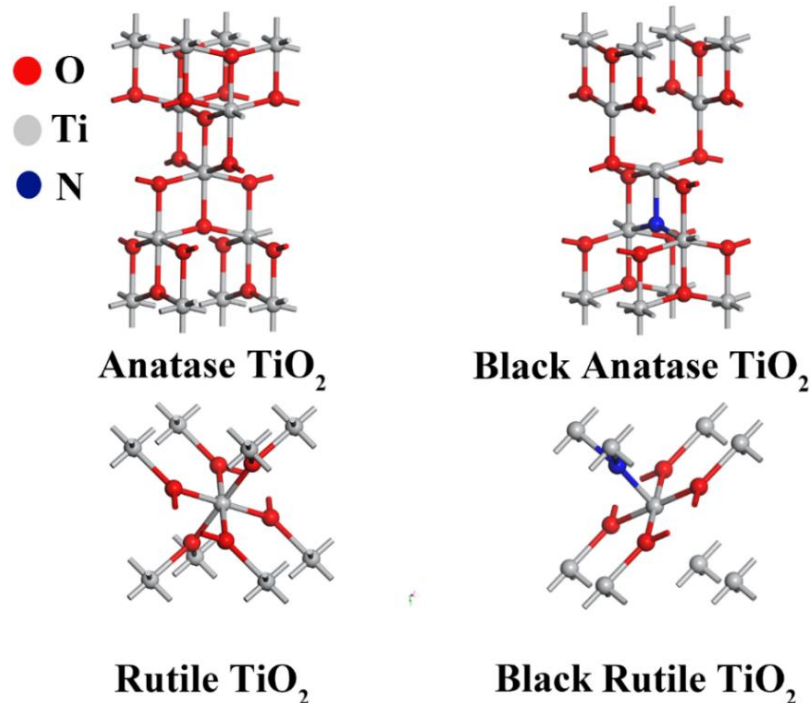

**Figure S10.** Unit cells of anatase  $\text{TiO}_2$ , black anatase  $\text{TiO}_2$ , rutile  $\text{TiO}_2$ , and black rutile  $\text{TiO}_2$  for first-principles calculations.

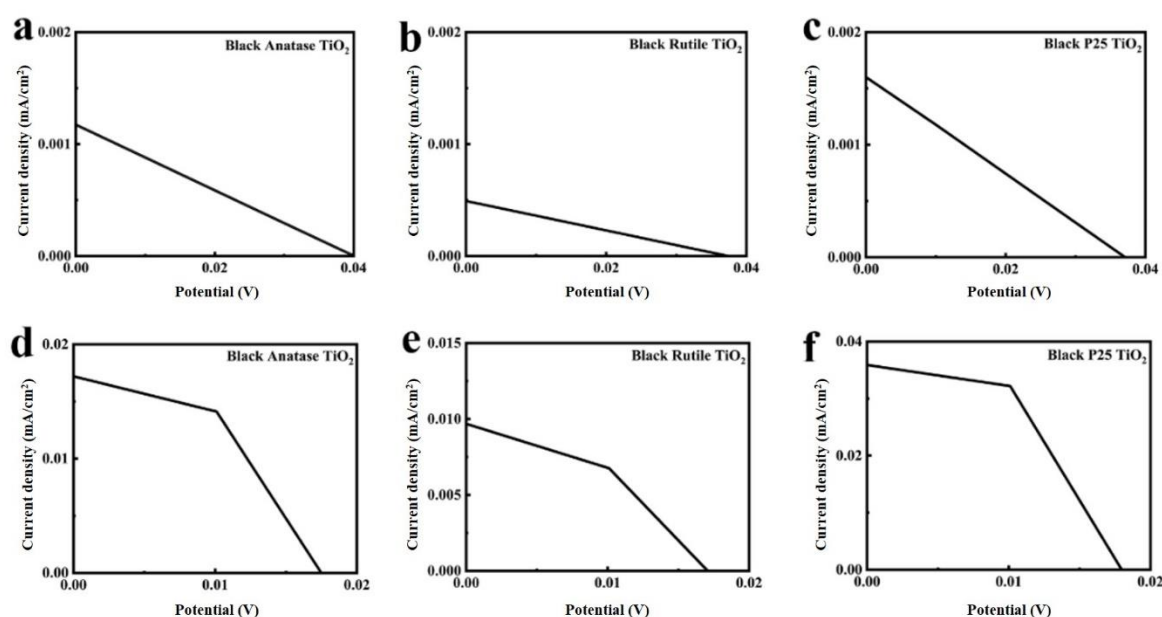

**Figure S11.** (a), (b) and (c) are J-V curves of black anatase TiO<sub>2</sub>, rutile TiO<sub>2</sub>, and P25 TiO<sub>2</sub> samples assembled with a S<sup>2-</sup>/Sn<sup>2-</sup> electrolyte and copper sulfide counter electrode without quantum dot sensitization. (d), (e) and (f) are J-V curves of black anatase TiO<sub>2</sub>, rutile TiO<sub>2</sub>, and P25 TiO<sub>2</sub> samples assembled with a platinum electrode using S<sup>2-</sup>/Sn<sup>2-</sup> electrolyte without quantum dot sensitization.

**Table S1.** Performance parameters of CdS/CdSe co-sensitized QDSSCs based on different reports.

| Photoanode                                        | QDs      | $J_{sc}(\text{mA}/\text{cm}^2)$ | $V_{oc}(\text{V})$ | FF   | PCE(%) | Ref.             |
|---------------------------------------------------|----------|---------------------------------|--------------------|------|--------|------------------|
| TiO <sub>2</sub> NPs                              | CdS/CdSe | 11.91                           | 0.59               | 0.51 | 3.56   | S1               |
| ZnO NDs/TiO <sub>2</sub> NPs                      | CdS/CdSe | 15.34                           | 0.66               | 0.53 | 5.36   | S2               |
| TiO <sub>2</sub> NWs–ZnO NSs                      | CdS/CdSe | 16.11                           | 0.51               | 0.55 | 4.57   | S3               |
| TiO <sub>2</sub> NWs/TiO <sub>2</sub> NSs–ZnO NRs | CdS/CdSe | 19.19                           | 0.52               | 0.54 | 5.38   | S4               |
| TiO <sub>2</sub> MPs/NWs                          | CdS/CdSe | 19.32                           | 0.53               | 0.59 | 6.01   | S5               |
| TiO <sub>2</sub> NWs                              | CdS/CdSe | 17.98                           | 0.47               | 0.50 | 4.20   | S6               |
| ZnO NDs                                           | CdS/CdSe | 16.0                            | 0.62               | 0.49 | 4.86   | S7               |
| ZnO TP                                            | CdS/CdSe | 13.85                           | 0.72               | 0.42 | 4.24   | S8               |
| ZnO NWs                                           | CdS/CdSe | 17.3                            | 0.63               | 0.38 | 4.15   | S9               |
| TiO <sub>2</sub> /ZnO NSs                         | CdS/CdSe | 16.11                           | 0.51               | 0.55 | 4.57   | S10              |
| black P25 TiO <sub>2</sub> NDs                    | CdS/CdSe | 25.0                            | 0.61               | 0.38 | 5.91   | <b>This work</b> |
| D-G black P25 TiO <sub>2</sub> NDs                | CdS/CdSe | 50.3                            | 0.61               | 0.39 | 11.67  | <b>This work</b> |

## References

- S1. Kim, S.K.; Raj, C.J.; Kim, H.J. CdS/CdSe quantum dot-sensitized solar cells based on ZnO nanoparticle/nanorod composite electrodes. *Electron. Mater. Lett.* **2014**, *10*, 1137–1142. <https://doi.org/10.1007/s13391-014-4144-0>.
- S2. Jin, B.B.; Wang, Y.F.; Zeng, J.H. Performance enhancement in titania based quantum dot sensitized solar cells through incorporation of disc shaped ZnO nanoparticles into photoanode. *Chem. Phys. Lett.* **2016**, *660*, 76–80. <https://doi.org/10.1016/j.cplett.2016.08.009>.

- S3. Feng, H.L.; Wu, W.Q.; Rao, H.S.; Wan, Q.; Li, L.B.; Kuang, D.B.; Su, C.Y. Three-dimensional TiO<sub>2</sub>/ZnO hybrid array as a hetero-structured anode for efficient quantum-dot-sensitized solar cells. *ACS Appl. Mater. Interfaces* **2015**, *7*, 5199–5205. <https://doi.org/10.1021/am507983y>.
- S4. Feng, H.L.; Wu, W.Q.; Rao, H.S.; Li, L.B.; Kuang, D.B.; Su, C.Y. Three-dimensional hyperbranched TiO<sub>2</sub>/ZnO heterostructured arrays for efficient quantum dot-sensitized solar cells. *J. Mater. Chem. A* **2015**, *3*, 14826–14832. <https://doi.org/10.1039/C5TA02269J>.
- S5. Xu, Y.F.; Wu, W.Q.; Rao, H.S.; Chen, H.Y.; Kuang, D.B.; Su, C.Y. CdS/CdSe co-sensitized TiO<sub>2</sub> nanowire-coated hollow Spheres exceeding 6% photovoltaic performance. *Nano Energy* **2015**, *11*, 621–630. <https://doi.org/10.1016/j.nanoen.2014.11.045>.
- S6. Kim, S.K.; Son, M.K.; Park, S.; Jeong, M.S.; Prabakar, K.; Kim, H.J. Surface modification on TiO<sub>2</sub> nanoparticles in CdS/CdSe Quantum Dot-sensitized Solar Cell. *Electrochim. Acta* **2014**, *118*, 118–123. <https://doi.org/10.1016/j.electacta.2013.11.191>.
- S7. Raj, C.J.; Karthick, S.N.; Hemalatha, K.V.; Kim, H.J.; Prabakar, K. Highly efficient ZnO porous nanostructure for CdS/CdSe quantum dot sensitized solar cell. *Thin Solid Films* **2013**, *548*, 636–640. <https://doi.org/10.1016/j.tsf.2013.10.009>.
- S8. Seol, M.; Kim, H.; Tak, Y.; Yong, K. Novel nanowire array based highly efficient quantum dot sensitized solar cell. *Chem Commun (Camb)* **2010**, *46*, 5521–5523. <https://doi.org/10.1039/c0cc00542h>.
- S9. Kim, S.K.; Gopi C.V.V.M.; Rao, S.S.; Punnoose, D.; Kim, H.J. Highly efficient yttrium-doped ZnO nanorods for quantum dot-sensitized solar cells. *Appl. Surf. Sci.* **2016**, *365*, 136–142. <https://doi.org/10.1016/j.apsusc.2016.01.043>.
- S10. Zhao, H.; Huang, F.; Hou, J.; Liu, Z.; Wu, Q.; Cao, H.; Jing, Q.; Peng, S.; Cao, G. Efficiency Enhancement of Quantum Dot Sensitized TiO<sub>2</sub>/ZnO Nanorod Arrays Solar Cells by Plasmonic Ag Nanoparticles. *ACS Appl. Mater. Interfaces* **2016**, *8*, 26675–26682. <https://doi.org/10.1021/acsami.6b06386>.
